# Supplementary material for: Templated assembly of μ5-CO32− decanuclear praseodymium and neodymium clusters through spontaneous fixation of atmospheric carbon dioxide
Source: Royal Society of Chemistry journal article supplement (doi:10.1039/b918772c), 2009-01-01
Supplement: b918772c.pdf [file b918772c.pdf]

## Supporting Information

### Templated assembly of $\mu_5$ -CO<sub>3</sub><sup>2-</sup> decanuclear praseodymium and neodymium clusters through spontaneous fixation of atmospheric carbon dioxide

Hongshan Ke,<sup>a,b</sup> Lang Zhao,<sup>a</sup> Gong-Feng Xu,<sup>a</sup> Yun-Nan Guo,<sup>a</sup> Jinkui Tang,<sup>\*a</sup> Xi-Yan Zhang<sup>b</sup> and Hong-Jie Zhang<sup>\*a</sup>

<sup>a</sup> State Key Laboratory of Rare Earth Resource Utilization, Changchun Institute of Applied Chemistry, Chinese Academy of Sciences, Changchun 130022, P. R. China. Fax: 86 431 85262878; Tel: 86 431 8526278; E-mail: tang@ciac.jl.cn

<sup>b</sup> School of Material Science and Engineering, Changchun University of Science and Technology, Changchun 130022, China

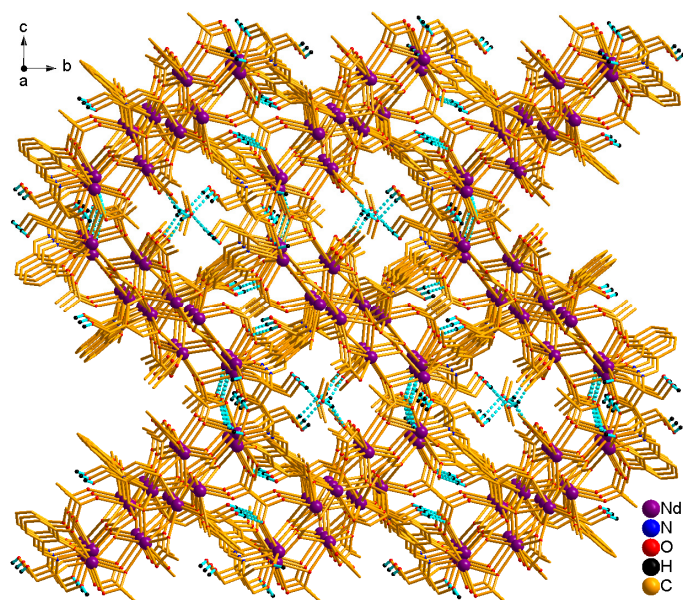

Fig. S1 Three-dimensional frameworks in the crystal structure of 1.

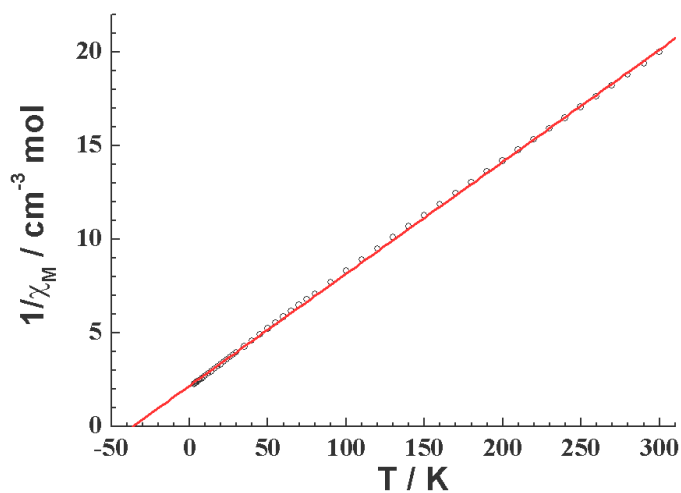

Fig S2. Plot of  $1/\chi_M$  vs.  $T$  for **1**. The solid line is the best-fit to a Curie-Weiss law

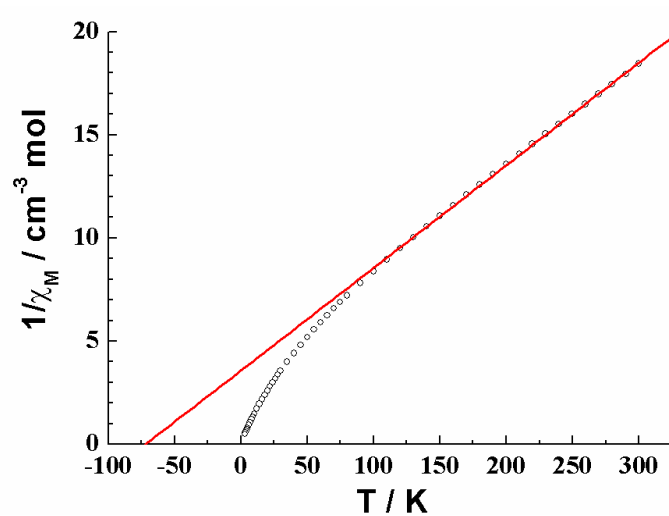

Fig S3. Plot of  $1/\chi_M$  vs.  $T$  for **2**. The solid line is the best-fit to a Curie-Weiss law

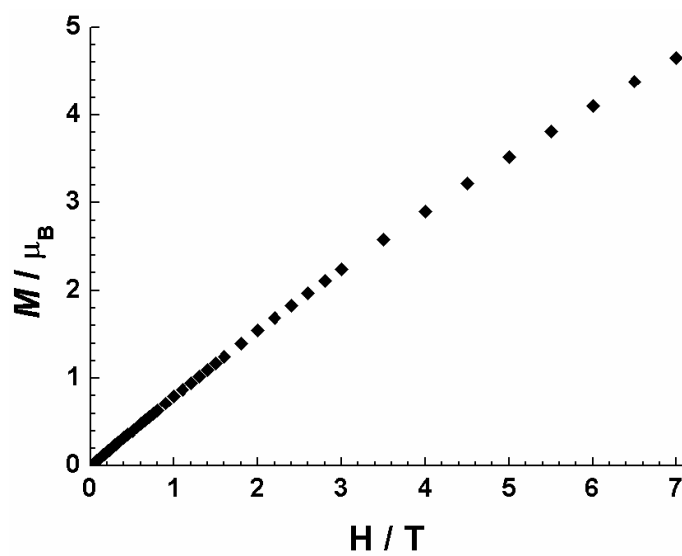

Fig. S4  $M$  vs  $H$  plot of the complex **1** at 1.9 K

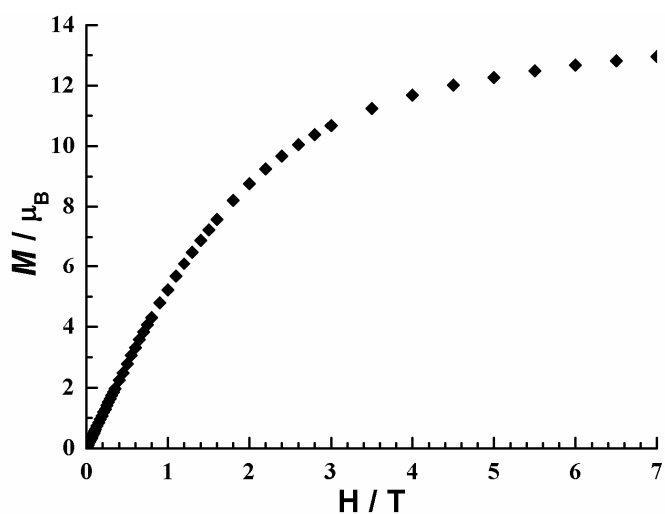

Fig. S5  $M$  vs  $H$  plot of the complex 2 at 1.9 K

Table S1 Selected bond lengths (Å) and angles (°) for **1<sup>a</sup>**

|                  |           |                  |           |
|------------------|-----------|------------------|-----------|
| Pr(1)-O(1)       | 2.382(10) | Pr(3)-O(15)      | 2.684(8)  |
| Pr(1)-O(11)      | 2.431(9)  | Pr(3)-O(7)       | 2.731(9)  |
| Pr(1)-O(28)      | 2.467(7)  | Pr(3)-O(25)      | 2.733(9)  |
| Pr(1)-O(15)      | 2.494(9)  | Pr(3)-C(29)      | 2.963(14) |
| Pr(1)-O(4)       | 2.504(8)  | Pr(3)-C(38)      | 2.990(14) |
| Pr(1)-O(14)      | 2.534(10) | Pr(4)-O(22)      | 2.441(11) |
| Pr(1)-O(13)      | 2.545(9)  | Pr(4)-O(10)      | 2.447(8)  |
| Pr(1)-N(1)       | 2.606(11) | Pr(4)-O(8)       | 2.450(7)  |
| Pr(1)-O(3)       | 2.640(9)  | Pr(4)-O(29)      | 2.554(8)  |
| Pr(2)-O(21)      | 2.374(11) | Pr(4)-O(18)      | 2.570(8)  |
| Pr(2)-O(13)      | 2.406(11) | Pr(4)-O(32)#1    | 2.583(12) |
| Pr(2)-O(1)       | 2.468(8)  | Pr(4)-O(31)#1    | 2.587(9)  |
| Pr(2)-O(29)      | 2.470(8)  | Pr(4)-O(26)      | 2.619(10) |
| Pr(2)-O(20)      | 2.499(11) | Pr(4)-O(27)      | 2.629(14) |
| Pr(2)-O(17)      | 2.559(9)  | Pr(4)-O(30)      | 2.933(8)  |
| Pr(2)-O(18)      | 2.571(10) | Pr(5)-O(31)      | 2.446(8)  |
| Pr(2)-O(19)      | 2.606(11) | Pr(5)-O(6)       | 2.456(8)  |
| Pr(2)-O(2)       | 2.683(10) | Pr(5)-O(25)      | 2.458(9)  |
| Pr(3)-O(12)      | 2.419(9)  | Pr(5)-O(30)      | 2.501(8)  |
| Pr(3)-O(6)       | 2.425(8)  | Pr(5)-O(8)       | 2.508(7)  |
| Pr(3)-O(23)      | 2.506(10) | Pr(5)-O(10)      | 2.533(7)  |
| Pr(3)-O(24)      | 2.507(10) | Pr(5)-N(2)       | 2.547(11) |
| Pr(3)-O(16)      | 2.518(10) | Pr(5)-O(10)#1    | 2.552(7)  |
| Pr(3)-O(28)      | 2.528(8)  | Pr(5)-O(8)#1     | 2.582(8)  |
| Pr(3)-O(30)      | 2.646(8)  |                  |           |
| O(1)-Pr(1)-O(11) | 79.3(3)   | O(10)-Pr(4)-O(8) | 60.1(2)   |

Electronic Supplementary Information for Dalton Transactions  
This journal is © The Royal Society of Chemistry 2009

|                   |          |                       |          |
|-------------------|----------|-----------------------|----------|
| O(1)-Pr(1)-O(28)  | 77.6(3)  | O(22)-Pr(4)-O(29)     | 78.2(3)  |
| O(11)-Pr(1)-O(28) | 78.3(3)  | O(10)-Pr(4)-O(29)     | 112.4(2) |
| O(1)-Pr(1)-O(15)  | 142.2(3) | O(8)-Pr(4)-O(29)      | 86.5(2)  |
| O(11)-Pr(1)-O(15) | 75.1(3)  | O(22)-Pr(4)-O(18)     | 72.0(3)  |
| O(28)-Pr(1)-O(15) | 70.4(3)  | O(10)-Pr(4)-O(18)     | 154.7(3) |
| O(1)-Pr(1)-O(4)   | 132.6(3) | O(8)-Pr(4)-O(18)      | 141.2(3) |
| O(11)-Pr(1)-O(4)  | 95.5(3)  | O(29)-Pr(4)-O(18)     | 65.8(3)  |
| O(28)-Pr(1)-O(4)  | 148.0(3) | O(22)-Pr(4)-O(32)#1   | 70.8(5)  |
| O(15)-Pr(1)-O(4)  | 77.7(3)  | O(10)-Pr(4)-O(32)#1   | 112.0(4) |
| O(1)-Pr(1)-O(14)  | 119.3(3) | O(8)-Pr(4)-O(32)#1    | 114.8(4) |
| O(11)-Pr(1)-O(14) | 152.9(3) | O(29)-Pr(4)-O(32)#1   | 135.6(4) |
| O(28)-Pr(1)-O(14) | 86.4(3)  | O(18)-Pr(4)-O(32)#1   | 74.7(3)  |
| O(15)-Pr(1)-O(14) | 78.8(3)  | O(22)-Pr(4)-O(31)#1   | 81.0(4)  |
| O(4)-Pr(1)-O(14)  | 85.7(3)  | O(10)-Pr(4)-O(31)#1   | 70.6(3)  |
| O(1)-Pr(1)-O(13)  | 68.4(3)  | O(8)-Pr(4)-O(31)#1    | 71.1(3)  |
| O(11)-Pr(1)-O(13) | 140.5(3) | O(29)-Pr(4)-O(31)#1   | 152.5(3) |
| O(28)-Pr(1)-O(13) | 73.1(3)  | O(18)-Pr(4)-O(31)#1   | 123.6(3) |
| O(15)-Pr(1)-O(13) | 118.3(3) | O(32)#1-Pr(4)-O(31)#1 | 49.6(3)  |
| O(4)-Pr(1)-O(13)  | 123.0(3) | O(22)-Pr(4)-O(26)     | 144.3(3) |
| O(14)-Pr(1)-O(13) | 50.9(3)  | O(10)-Pr(4)-O(26)     | 79.6(3)  |
| O(1)-Pr(1)-N(1)   | 67.9(3)  | O(8)-Pr(4)-O(26)      | 124.8(3) |
| O(11)-Pr(1)-N(1)  | 75.4(3)  | O(29)-Pr(4)-O(26)     | 75.1(3)  |
| O(28)-Pr(1)-N(1)  | 139.7(3) | O(18)-Pr(4)-O(26)     | 75.6(3)  |
| O(15)-Pr(1)-N(1)  | 129.3(3) | O(32)#1-Pr(4)-O(26)   | 114.5(4) |
| O(4)-Pr(1)-N(1)   | 65.2(3)  | O(31)#1-Pr(4)-O(26)   | 130.8(3) |
| O(14)-Pr(1)-N(1)  | 128.3(3) | O(22)-Pr(4)-O(27)     | 133.2(4) |
| O(13)-Pr(1)-N(1)  | 110.8(3) | O(10)-Pr(4)-O(27)     | 83.4(3)  |
| O(1)-Pr(1)-O(3)   | 82.2(3)  | O(8)-Pr(4)-O(27)      | 142.2(3) |
| O(11)-Pr(1)-O(3)  | 133.6(3) | O(29)-Pr(4)-O(27)     | 118.8(3) |
| O(28)-Pr(1)-O(3)  | 137.6(3) | O(18)-Pr(4)-O(27)     | 76.7(4)  |
| O(15)-Pr(1)-O(3)  | 135.4(3) | O(32)#1-Pr(4)-O(27)   | 68.0(5)  |
| O(4)-Pr(1)-O(3)   | 67.7(3)  | O(31)#1-Pr(4)-O(27)   | 88.7(4)  |
| O(14)-Pr(1)-O(3)  | 71.7(3)  | O(26)-Pr(4)-O(27)     | 48.9(3)  |
| O(13)-Pr(1)-O(3)  | 64.9(3)  | O(22)-Pr(4)-O(30)     | 114.2(3) |
| N(1)-Pr(1)-O(3)   | 58.3(3)  | O(10)-Pr(4)-O(30)     | 65.7(2)  |
| O(21)-Pr(2)-O(13) | 148.6(4) | O(8)-Pr(4)-O(30)      | 68.5(2)  |
| O(21)-Pr(2)-O(1)  | 132.7(3) | O(29)-Pr(4)-O(30)     | 47.0(2)  |
| O(13)-Pr(2)-O(1)  | 69.3(3)  | O(18)-Pr(4)-O(30)     | 105.4(2) |
| O(21)-Pr(2)-O(29) | 83.0(3)  | O(32)#1-Pr(4)-O(30)   | 174.9(5) |
| O(13)-Pr(2)-O(29) | 75.8(3)  | O(31)#1-Pr(4)-O(30)   | 130.9(2) |
| O(1)-Pr(2)-O(29)  | 86.4(3)  | O(26)-Pr(4)-O(30)     | 60.9(3)  |
| O(21)-Pr(2)-O(20) | 87.5(4)  | O(27)-Pr(4)-O(30)     | 107.0(3) |
| O(13)-Pr(2)-O(20) | 121.9(4) | O(31)-Pr(5)-O(6)      | 79.9(3)  |

Electronic Supplementary Information for Dalton Transactions  
This journal is © The Royal Society of Chemistry 2009

|                   |          |                       |            |
|-------------------|----------|-----------------------|------------|
| O(1)-Pr(2)-O(20)  | 79.6(3)  | O(31)-Pr(5)-O(25)     | 83.7(3)    |
| O(29)-Pr(2)-O(20) | 150.2(3) | O(6)-Pr(5)-O(25)      | 69.1(3)    |
| O(21)-Pr(2)-O(17) | 77.7(4)  | O(31)-Pr(5)-O(30)     | 144.1(3)   |
| O(13)-Pr(2)-O(17) | 91.5(3)  | O(6)-Pr(5)-O(30)      | 66.6(3)    |
| O(1)-Pr(2)-O(17)  | 145.6(3) | O(25)-Pr(5)-O(30)     | 73.1(3)    |
| O(29)-Pr(2)-O(17) | 117.3(3) | O(31)-Pr(5)-O(8)      | 135.9(3)   |
| O(20)-Pr(2)-O(17) | 87.8(3)  | O(6)-Pr(5)-O(8)       | 119.7(3)   |
| O(21)-Pr(2)-O(18) | 76.0(4)  | O(25)-Pr(5)-O(8)      | 138.9(3)   |
| O(13)-Pr(2)-O(18) | 74.4(3)  | O(30)-Pr(5)-O(8)      | 75.2(2)    |
| O(1)-Pr(2)-O(18)  | 139.3(3) | O(31)-Pr(5)-O(10)     | 135.1(3)   |
| O(29)-Pr(2)-O(18) | 67.0(3)  | O(6)-Pr(5)-O(10)      | 136.3(2)   |
| O(20)-Pr(2)-O(18) | 137.3(3) | O(25)-Pr(5)-O(10)     | 87.3(3)    |
| O(17)-Pr(2)-O(18) | 50.6(3)  | O(30)-Pr(5)-O(10)     | 71.7(2)    |
| O(21)-Pr(2)-O(19) | 132.7(4) | O(8)-Pr(5)-O(10)      | 58.2(2)    |
| O(13)-Pr(2)-O(19) | 71.0(4)  | O(31)-Pr(5)-N(2)      | 85.4(4)    |
| O(1)-Pr(2)-O(19)  | 70.1(3)  | O(6)-Pr(5)-N(2)       | 69.3(3)    |
| O(29)-Pr(2)-O(19) | 144.3(4) | O(25)-Pr(5)-N(2)      | 138.2(3)   |
| O(20)-Pr(2)-O(19) | 52.5(4)  | O(30)-Pr(5)-N(2)      | 93.9(3)    |
| O(17)-Pr(2)-O(19) | 76.8(3)  | O(8)-Pr(5)-N(2)       | 68.8(3)    |
| O(18)-Pr(2)-O(19) | 114.6(4) | O(10)-Pr(5)-N(2)      | 127.0(3)   |
| O(21)-Pr(2)-O(2)  | 72.3(3)  | O(31)-Pr(5)-O(10)#1   | 71.2(3)    |
| O(13)-Pr(2)-O(2)  | 122.8(3) | O(6)-Pr(5)-O(10)#1    | 128.0(3)   |
| O(1)-Pr(2)-O(2)   | 60.4(3)  | O(25)-Pr(5)-O(10)#1   | 144.2(3)   |
| O(29)-Pr(2)-O(2)  | 75.4(3)  | O(30)-Pr(5)-O(10)#1   | 140.4(3)   |
| O(20)-Pr(2)-O(2)  | 74.8(3)  | O(8)-Pr(5)-O(10)#1    | 65.9(2)    |
| O(17)-Pr(2)-O(2)  | 145.7(4) | O(10)-Pr(5)-O(10)#1   | 92.8(2)    |
| O(18)-Pr(2)-O(2)  | 133.1(3) | N(2)-Pr(5)-O(10)#1    | 66.2(3)    |
| O(19)-Pr(2)-O(2)  | 112.3(4) | O(31)-Pr(5)-O(8)#1    | 71.2(3)    |
| O(12)-Pr(3)-O(6)  | 80.0(3)  | O(6)-Pr(5)-O(8)#1     | 146.7(3)   |
| O(12)-Pr(3)-O(23) | 139.2(3) | O(25)-Pr(5)-O(8)#1    | 91.2(3)    |
| O(6)-Pr(3)-O(23)  | 126.7(3) | O(30)-Pr(5)-O(8)#1    | 134.6(3)   |
| O(12)-Pr(3)-O(24) | 134.0(4) | O(8)-Pr(5)-O(8)#1     | 92.9(2)    |
| O(6)-Pr(3)-O(24)  | 93.0(3)  | O(10)-Pr(5)-O(8)#1    | 65.1(2)    |
| O(23)-Pr(3)-O(24) | 80.2(4)  | N(2)-Pr(5)-O(8)#1     | 122.8(3)   |
| O(12)-Pr(3)-O(16) | 78.2(4)  | O(10)#1-Pr(5)-O(8)#1  | 57.0(2)    |
| O(6)-Pr(3)-O(16)  | 134.9(3) | O(31)-Pr(5)-Pr(5)#1   | 106.1(2)   |
| O(23)-Pr(3)-O(16) | 94.6(4)  | O(6)-Pr(5)-Pr(5)#1    | 165.9(2)   |
| O(24)-Pr(3)-O(16) | 75.3(3)  | O(25)-Pr(5)-Pr(5)#1   | 123.7(2)   |
| O(12)-Pr(3)-O(28) | 69.3(3)  | O(30)-Pr(5)-Pr(5)#1   | 109.50(18) |
| O(6)-Pr(3)-O(28)  | 94.0(3)  | O(8)-Pr(5)-Pr(5)#1    | 47.33(17)  |
| O(23)-Pr(3)-O(28) | 77.7(3)  | O(10)-Pr(5)-Pr(5)#1   | 46.63(17)  |
| O(24)-Pr(3)-O(28) | 156.6(3) | N(2)-Pr(5)-Pr(5)#1    | 98.1(2)    |
| O(16)-Pr(3)-O(28) | 114.0(3) | O(10)#1-Pr(5)-Pr(5)#1 | 46.16(17)  |

Electronic Supplementary Information for Dalton Transactions  
 This journal is © The Royal Society of Chemistry 2009

|                   |          |                       |            |
|-------------------|----------|-----------------------|------------|
| O(12)-Pr(3)-O(30) | 103.5(3) | O(8)#1-Pr(5)-Pr(5)#1  | 45.58(17)  |
| O(6)-Pr(3)-O(30)  | 64.7(3)  | O(31)-Pr(5)-Pr(4)#1   | 41.3(2)    |
| O(23)-Pr(3)-O(30) | 70.5(3)  | O(6)-Pr(5)-Pr(4)#1    | 119.94(19) |
| O(24)-Pr(3)-O(30) | 114.4(3) | O(25)-Pr(5)-Pr(4)#1   | 106.5(2)   |
| O(16)-Pr(3)-O(30) | 159.4(3) | O(30)-Pr(5)-Pr(4)#1   | 173.10(19) |
| O(28)-Pr(3)-O(30) | 50.2(2)  | O(8)-Pr(5)-Pr(4)#1    | 101.97(17) |
| O(12)-Pr(3)-O(15) | 72.9(3)  | O(10)-Pr(5)-Pr(4)#1   | 101.45(17) |
| O(6)-Pr(3)-O(15)  | 150.8(3) | N(2)-Pr(5)-Pr(4)#1    | 90.9(2)    |
| O(23)-Pr(3)-O(15) | 72.3(3)  | O(10)#1-Pr(5)-Pr(4)#1 | 38.49(17)  |
| O(24)-Pr(3)-O(15) | 113.7(3) | O(8)#1-Pr(5)-Pr(4)#1  | 38.69(17)  |
| O(16)-Pr(3)-O(15) | 49.4(3)  | Pr(5)#1-Pr(5)-Pr(4)#1 | 64.77(2)   |
| O(28)-Pr(3)-O(15) | 66.4(3)  | Pr(1)-O(1)-Pr(2)      | 111.5(4)   |
| O(30)-Pr(3)-O(15) | 110.9(3) | Pr(3)-O(6)-Pr(5)      | 105.6(3)   |
| O(12)-Pr(3)-O(7)  | 65.1(3)  | Pr(4)-O(8)-Pr(5)      | 105.9(3)   |
| O(6)-Pr(3)-O(7)   | 59.6(3)  | Pr(4)-O(8)-Pr(5)#1    | 100.1(3)   |
| O(23)-Pr(3)-O(7)  | 152.1(4) | Pr(5)-O(8)-Pr(5)#1    | 87.1(2)    |
| O(24)-Pr(3)-O(7)  | 72.1(4)  | Pr(4)-O(10)-Pr(5)     | 105.2(3)   |
| O(16)-Pr(3)-O(7)  | 75.4(3)  | Pr(4)-O(10)-Pr(5)#1   | 101.0(3)   |
| O(28)-Pr(3)-O(7)  | 130.2(3) | Pr(5)-O(10)-Pr(5)#1   | 87.2(2)    |
| O(30)-Pr(3)-O(7)  | 124.2(3) | Pr(2)-O(13)-Pr(1)     | 108.2(4)   |
| O(15)-Pr(3)-O(7)  | 115.8(3) | Pr(1)-O(15)-Pr(3)     | 108.0(3)   |
| O(12)-Pr(3)-O(25) | 144.7(3) | Pr(4)-O(18)-Pr(2)     | 109.4(3)   |
| O(6)-Pr(3)-O(25)  | 65.0(3)  | Pr(5)-O(25)-Pr(3)     | 96.9(3)    |
| O(23)-Pr(3)-O(25) | 71.7(3)  | Pr(1)-O(28)-Pr(3)     | 114.1(3)   |
| O(24)-Pr(3)-O(25) | 48.6(3)  | Pr(2)-O(29)-Pr(4)     | 113.2(3)   |
| O(16)-Pr(3)-O(25) | 123.4(3) | Pr(5)-O(30)-Pr(3)     | 98.1(3)    |
| O(28)-Pr(3)-O(25) | 115.8(3) | Pr(5)-O(30)-Pr(4)     | 93.1(2)    |
| O(30)-Pr(3)-O(25) | 66.6(3)  | Pr(3)-O(30)-Pr(4)     | 160.8(3)   |
| O(15)-Pr(3)-O(25) | 142.2(3) | Pr(5)-O(31)-Pr(4)#1   | 100.1(3)   |
| O(7)-Pr(3)-O(25)  | 91.8(3)  | O(28)-C(42)-O(30)     | 118.4(10)  |
| O(22)-Pr(4)-O(10) | 133.2(3) | O(28)-C(42)-O(29)     | 123.0(10)  |
| O(22)-Pr(4)-O(8)  | 76.1(3)  | O(30)-C(42)-O(29)     | 118.6(10)  |

<sup>a</sup> Symmetry operation: #1 -x+1,-y,-z+2

**Table S2** Selected bond lengths (Å) and angles (°) for **2<sup>a</sup>**

|             |          |             |          |
|-------------|----------|-------------|----------|
| Nd(1)-O(1)  | 2.382(5) | Nd(3)-O(15) | 2.659(5) |
| Nd(1)-O(11) | 2.423(5) | Nd(3)-O(7)  | 2.721(5) |
| Nd(1)-O(29) | 2.452(5) | Nd(3)-O(25) | 2.741(5) |
| Nd(1)-O(15) | 2.472(5) | Nd(4)-O(22) | 2.420(6) |
| Nd(1)-O(4)  | 2.496(5) | Nd(4)-O(9)  | 2.445(5) |
| Nd(1)-O(14) | 2.524(6) | Nd(4)-O(10) | 2.450(5) |
| Nd(1)-O(13) | 2.530(5) | Nd(4)-O(28) | 2.532(5) |
| Nd(1)-N(1)  | 2.609(6) | Nd(4)-O(18) | 2.549(5) |

Electronic Supplementary Information for Dalton Transactions  
This journal is © The Royal Society of Chemistry 2009

|                   |            |                       |            |
|-------------------|------------|-----------------------|------------|
| Nd(1)-O(3)        | 2.625(5)   | Nd(4)-O(31)#1         | 2.553(5)   |
| Nd(2)-O(21)       | 2.357(6)   | Nd(4)-O(26)           | 2.563(7)   |
| Nd(2)-O(13)       | 2.396(6)   | Nd(4)-O(32)#1         | 2.580(6)   |
| Nd(2)-O(1)        | 2.449(5)   | Nd(4)-O(27)           | 2.610(5)   |
| Nd(2)-O(28)       | 2.459(5)   | Nd(4)-O(30)           | 2.945(5)   |
| Nd(2)-O(19)       | 2.467(6)   | Nd(4)-Nd(5)#1         | 3.8297(5)  |
| Nd(2)-O(18)       | 2.551(6)   | Nd(5)-O(31)           | 2.421(5)   |
| Nd(2)-O(17)       | 2.554(5)   | Nd(5)-O(25)           | 2.432(5)   |
| Nd(2)-O(20)       | 2.583(6)   | Nd(5)-O(6)            | 2.436(5)   |
| Nd(2)-O(2)        | 2.679(5)   | Nd(5)-O(9)            | 2.476(5)   |
| Nd(2)-C(31)       | 2.938(8)   | Nd(5)-O(30)           | 2.483(5)   |
| Nd(3)-O(12)       | 2.407(5)   | Nd(5)-O(10)#1         | 2.520(4)   |
| Nd(3)-O(6)        | 2.412(5)   | Nd(5)-O(10)           | 2.527(5)   |
| Nd(3)-O(23)       | 2.485(5)   | Nd(5)-N(2)            | 2.538(6)   |
| Nd(3)-O(24)       | 2.490(5)   | Nd(5)-O(9)#1          | 2.572(5)   |
| Nd(3)-O(16)       | 2.499(5)   | Nd(5)-Nd(5)#1         | 3.4714(7)  |
| Nd(3)-O(29)       | 2.505(5)   | Nd(5)-Nd(4)#1         | 3.8297(5)  |
| Nd(3)-O(30)       | 2.609(5)   |                       |            |
| O(1)-Nd(1)-O(11)  | 79.14(18)  | O(10)-Nd(4)-O(18)     | 153.87(17) |
| O(1)-Nd(1)-O(29)  | 77.32(17)  | O(28)-Nd(4)-O(18)     | 65.90(16)  |
| O(11)-Nd(1)-O(29) | 78.51(17)  | O(22)-Nd(4)-O(31)#1   | 81.75(19)  |
| O(1)-Nd(1)-O(15)  | 141.50(17) | O(9)-Nd(4)-O(31)#1    | 71.35(16)  |
| O(11)-Nd(1)-O(15) | 75.15(17)  | O(10)-Nd(4)-O(31)#1   | 70.08(16)  |
| O(29)-Nd(1)-O(15) | 69.87(16)  | O(28)-Nd(4)-O(31)#1   | 152.77(17) |
| O(1)-Nd(1)-O(4)   | 133.89(17) | O(18)-Nd(4)-O(31)#1   | 124.69(16) |
| O(11)-Nd(1)-O(4)  | 95.56(17)  | O(22)-Nd(4)-O(26)     | 132.9(2)   |
| O(29)-Nd(1)-O(4)  | 147.07(17) | O(9)-Nd(4)-O(26)      | 142.47(19) |
| O(15)-Nd(1)-O(4)  | 77.27(16)  | O(10)-Nd(4)-O(26)     | 83.74(19)  |
| O(1)-Nd(1)-O(14)  | 120.18(18) | O(28)-Nd(4)-O(26)     | 119.01(18) |
| O(11)-Nd(1)-O(14) | 152.75(18) | O(18)-Nd(4)-O(26)     | 76.0(2)    |
| O(29)-Nd(1)-O(14) | 86.93(17)  | O(31)#1-Nd(4)-O(26)   | 88.17(19)  |
| O(15)-Nd(1)-O(14) | 78.25(18)  | O(22)-Nd(4)-O(32)#1   | 69.9(2)    |
| O(4)-Nd(1)-O(14)  | 84.21(18)  | O(9)-Nd(4)-O(32)#1    | 114.79(19) |
| O(1)-Nd(1)-O(13)  | 68.78(18)  | O(10)-Nd(4)-O(32)#1   | 112.96(19) |
| O(11)-Nd(1)-O(13) | 140.75(18) | O(28)-Nd(4)-O(32)#1   | 135.09(19) |
| O(29)-Nd(1)-O(13) | 73.02(16)  | O(18)-Nd(4)-O(32)#1   | 74.81(18)  |
| O(15)-Nd(1)-O(13) | 117.76(17) | O(31)#1-Nd(4)-O(32)#1 | 50.29(17)  |
| O(4)-Nd(1)-O(13)  | 122.87(17) | O(26)-Nd(4)-O(32)#1   | 68.4(2)    |
| O(14)-Nd(1)-O(13) | 51.45(18)  | O(22)-Nd(4)-O(27)     | 144.43(18) |
| O(1)-Nd(1)-N(1)   | 68.23(19)  | O(9)-Nd(4)-O(27)      | 123.80(16) |
| O(11)-Nd(1)-N(1)  | 74.69(18)  | O(10)-Nd(4)-O(27)     | 79.00(16)  |
| O(29)-Nd(1)-N(1)  | 139.46(19) | O(28)-Nd(4)-O(27)     | 74.79(16)  |

Electronic Supplementary Information for Dalton Transactions  
This journal is © The Royal Society of Chemistry 2009

|                   |            |                       |            |
|-------------------|------------|-----------------------|------------|
| O(15)-Nd(1)-N(1)  | 129.28(17) | O(18)-Nd(4)-O(27)     | 75.35(17)  |
| O(4)-Nd(1)-N(1)   | 66.24(19)  | O(31)#1-Nd(4)-O(27)   | 130.39(17) |
| O(14)-Nd(1)-N(1)  | 128.57(19) | O(26)-Nd(4)-O(27)     | 49.87(18)  |
| O(13)-Nd(1)-N(1)  | 111.47(18) | O(32)#1-Nd(4)-O(27)   | 115.9(2)   |
| O(1)-Nd(1)-O(3)   | 82.41(18)  | O(22)-Nd(4)-O(30)     | 114.05(18) |
| O(11)-Nd(1)-O(3)  | 133.72(17) | O(9)-Nd(4)-O(30)      | 67.89(14)  |
| O(29)-Nd(1)-O(3)  | 137.26(16) | O(10)-Nd(4)-O(30)     | 65.32(14)  |
| O(15)-Nd(1)-O(3)  | 135.81(18) | O(28)-Nd(4)-O(30)     | 46.96(14)  |
| O(4)-Nd(1)-O(3)   | 68.48(17)  | O(18)-Nd(4)-O(30)     | 105.11(14) |
| O(14)-Nd(1)-O(3)  | 71.45(18)  | O(31)#1-Nd(4)-O(30)   | 130.15(14) |
| O(13)-Nd(1)-O(3)  | 64.61(16)  | O(26)-Nd(4)-O(30)     | 107.53(18) |
| N(1)-Nd(1)-O(3)   | 59.06(18)  | O(32)#1-Nd(4)-O(30)   | 175.9(2)   |
| O(21)-Nd(2)-O(13) | 148.72(19) | O(27)-Nd(4)-O(30)     | 60.39(15)  |
| O(21)-Nd(2)-O(1)  | 132.6(2)   | O(22)-Nd(4)-Nd(5)#1   | 95.78(13)  |
| O(13)-Nd(2)-O(1)  | 69.92(17)  | O(9)-Nd(4)-Nd(5)#1    | 41.49(11)  |
| O(13)-Nd(2)-O(28) | 76.27(16)  | O(10)-Nd(4)-Nd(5)#1   | 40.28(10)  |
| O(1)-Nd(2)-O(28)  | 86.72(16)  | O(28)-Nd(4)-Nd(5)#1   | 126.01(11) |
| O(21)-Nd(2)-O(19) | 86.8(2)    | O(18)-Nd(4)-Nd(5)#1   | 162.27(12) |
| O(13)-Nd(2)-O(19) | 122.21(19) | O(31)#1-Nd(4)-Nd(5)#1 | 38.41(11)  |
| O(1)-Nd(2)-O(19)  | 79.40(18)  | O(26)-Nd(4)-Nd(5)#1   | 104.24(15) |
| O(28)-Nd(2)-O(19) | 149.93(18) | O(32)#1-Nd(4)-Nd(5)#1 | 88.69(13)  |
| O(21)-Nd(2)-O(18) | 76.0(2)    | O(27)-Nd(4)-Nd(5)#1   | 118.78(12) |
| O(13)-Nd(2)-O(18) | 74.33(17)  | O(30)-Nd(4)-Nd(5)#1   | 91.82(9)   |
| O(1)-Nd(2)-O(18)  | 139.69(17) | O(31)-Nd(5)-O(25)     | 83.39(18)  |
| O(28)-Nd(2)-O(18) | 66.94(16)  | O(31)-Nd(5)-O(6)      | 79.65(16)  |
| O(19)-Nd(2)-O(18) | 137.27(18) | O(25)-Nd(5)-O(6)      | 69.33(17)  |
| O(21)-Nd(2)-O(17) | 77.4(2)    | O(31)-Nd(5)-O(9)      | 136.10(17) |
| O(13)-Nd(2)-O(17) | 91.47(19)  | O(25)-Nd(5)-O(9)      | 138.94(16) |
| O(1)-Nd(2)-O(17)  | 145.58(18) | O(6)-Nd(5)-O(9)       | 120.02(16) |
| O(28)-Nd(2)-O(17) | 117.62(17) | O(31)-Nd(5)-O(30)     | 143.72(16) |
| O(19)-Nd(2)-O(17) | 87.41(19)  | O(25)-Nd(5)-O(30)     | 73.05(16)  |
| O(18)-Nd(2)-O(17) | 50.99(17)  | O(6)-Nd(5)-O(30)      | 66.50(16)  |
| O(21)-Nd(2)-O(20) | 131.8(2)   | O(9)-Nd(5)-O(30)      | 75.56(15)  |
| O(13)-Nd(2)-O(20) | 71.33(19)  | O(31)-Nd(5)-O(10)#1   | 71.09(16)  |
| O(1)-Nd(2)-O(20)  | 70.38(18)  | O(25)-Nd(5)-O(10)#1   | 143.46(16) |
| O(28)-Nd(2)-O(20) | 145.09(18) | O(6)-Nd(5)-O(10)#1    | 128.01(15) |
| O(19)-Nd(2)-O(20) | 52.3(2)    | O(9)-Nd(5)-O(10)#1    | 66.14(15)  |
| O(18)-Nd(2)-O(20) | 114.79(19) | O(30)-Nd(5)-O(10)#1   | 141.07(15) |
| O(17)-Nd(2)-O(20) | 76.36(18)  | O(31)-Nd(5)-O(10)     | 134.76(16) |
| O(21)-Nd(2)-O(2)  | 72.27(19)  | O(25)-Nd(5)-O(10)     | 86.59(16)  |
| O(13)-Nd(2)-O(2)  | 123.21(17) | O(6)-Nd(5)-O(10)      | 136.29(15) |
| O(1)-Nd(2)-O(2)   | 60.34(17)  | O(9)-Nd(5)-O(10)      | 58.62(15)  |
| O(28)-Nd(2)-O(2)  | 75.33(17)  | O(30)-Nd(5)-O(10)     | 71.89(15)  |



Electronic Supplementary Information for Dalton Transactions  
This journal is © The Royal Society of Chemistry 2009

|                   |            |                       |            |
|-------------------|------------|-----------------------|------------|
| O(19)-Nd(2)-O(2)  | 74.62(19)  | O(10)#1-Nd(5)-O(10)   | 93.09(14)  |
| O(18)-Nd(2)-O(2)  | 132.86(16) | O(31)-Nd(5)-N(2)      | 85.88(19)  |
| O(17)-Nd(2)-O(2)  | 145.32(19) | O(25)-Nd(5)-N(2)      | 138.54(18) |
| O(20)-Nd(2)-O(2)  | 112.34(19) | O(6)-Nd(5)-N(2)       | 69.37(18)  |
| O(12)-Nd(3)-O(6)  | 80.32(17)  | O(9)-Nd(5)-N(2)       | 68.73(18)  |
| O(12)-Nd(3)-O(23) | 140.34(18) | O(30)-Nd(5)-N(2)      | 93.75(17)  |
| O(6)-Nd(3)-O(23)  | 126.21(16) | O(10)#1-Nd(5)-N(2)    | 66.59(17)  |
| O(12)-Nd(3)-O(24) | 133.96(19) | O(10)-Nd(5)-N(2)      | 127.28(17) |
| O(6)-Nd(3)-O(24)  | 93.24(18)  | O(31)-Nd(5)-O(9)#1    | 71.38(16)  |
| O(23)-Nd(3)-O(24) | 78.8(2)    | O(25)-Nd(5)-O(9)#1    | 90.18(16)  |
| O(12)-Nd(3)-O(16) | 78.1(2)    | O(6)-Nd(5)-O(9)#1     | 146.31(16) |
| O(6)-Nd(3)-O(16)  | 134.20(18) | O(9)-Nd(5)-O(9)#1     | 93.13(14)  |
| O(23)-Nd(3)-O(16) | 95.0(2)    | O(30)-Nd(5)-O(9)#1    | 134.17(15) |
| O(24)-Nd(3)-O(16) | 74.40(18)  | O(10)#1-Nd(5)-O(9)#1  | 57.48(14)  |
| O(12)-Nd(3)-O(29) | 69.48(17)  | O(10)-Nd(5)-O(9)#1    | 64.64(14)  |
| O(6)-Nd(3)-O(29)  | 94.71(17)  | N(2)-Nd(5)-O(9)#1     | 123.70(17) |
| O(23)-Nd(3)-O(29) | 78.54(18)  | O(31)-Nd(5)-Nd(5)#1   | 106.10(12) |
| O(24)-Nd(3)-O(29) | 156.33(18) | O(25)-Nd(5)-Nd(5)#1   | 122.69(12) |
| O(16)-Nd(3)-O(29) | 114.32(17) | O(6)-Nd(5)-Nd(5)#1    | 166.73(12) |
| O(12)-Nd(3)-O(30) | 103.74(17) | O(9)-Nd(5)-Nd(5)#1    | 47.72(11)  |
| O(6)-Nd(3)-O(30)  | 64.86(16)  | O(30)-Nd(5)-Nd(5)#1   | 109.79(11) |
| O(23)-Nd(3)-O(30) | 70.69(16)  | O(10)#1-Nd(5)-Nd(5)#1 | 46.62(10)  |
| O(24)-Nd(3)-O(30) | 114.55(16) | O(10)-Nd(5)-Nd(5)#1   | 46.47(10)  |
| O(16)-Nd(3)-O(30) | 160.13(17) | N(2)-Nd(5)-Nd(5)#1    | 98.77(13)  |
| O(29)-Nd(3)-O(30) | 50.55(15)  | O(9)#1-Nd(5)-Nd(5)#1  | 45.40(10)  |
| O(12)-Nd(3)-O(15) | 73.21(17)  | O(31)-Nd(5)-Nd(4)#1   | 40.92(12)  |
| O(6)-Nd(3)-O(15)  | 151.38(16) | O(25)-Nd(5)-Nd(4)#1   | 105.39(12) |
| O(23)-Nd(3)-O(15) | 72.73(16)  | O(6)-Nd(5)-Nd(4)#1    | 119.50(11) |
| O(24)-Nd(3)-O(15) | 112.90(17) | O(9)-Nd(5)-Nd(4)#1    | 102.62(10) |
| O(16)-Nd(3)-O(15) | 50.19(17)  | O(30)-Nd(5)-Nd(4)#1   | 173.17(11) |
| O(29)-Nd(3)-O(15) | 66.10(16)  | O(10)#1-Nd(5)-Nd(4)#1 | 38.94(10)  |
| O(30)-Nd(3)-O(15) | 110.86(15) | O(10)-Nd(5)-Nd(4)#1   | 101.48(10) |
| O(12)-Nd(3)-O(7)  | 65.52(18)  | N(2)-Nd(5)-Nd(4)#1    | 91.67(13)  |
| O(6)-Nd(3)-O(7)   | 59.91(16)  | O(9)#1-Nd(5)-Nd(4)#1  | 39.02(10)  |
| O(23)-Nd(3)-O(7)  | 150.48(18) | Nd(5)#1-Nd(5)-Nd(4)#1 | 65.175(12) |
| O(24)-Nd(3)-O(7)  | 71.86(19)  | Nd(1)-O(1)-Nd(2)      | 111.0(2)   |
| O(16)-Nd(3)-O(7)  | 74.39(18)  | Nd(3)-O(6)-Nd(5)      | 105.70(18) |
| O(29)-Nd(3)-O(7)  | 130.98(17) | Nd(4)-O(9)-Nd(5)      | 106.56(17) |
| O(30)-Nd(3)-O(7)  | 124.71(15) | Nd(4)-O(9)-Nd(5)#1    | 99.49(16)  |
| O(15)-Nd(3)-O(7)  | 115.97(16) | Nd(5)-O(9)-Nd(5)#1    | 86.87(14)  |
| O(12)-Nd(3)-O(25) | 144.68(17) | Nd(4)-O(10)-Nd(5)#1   | 100.78(16) |
| O(6)-Nd(3)-O(25)  | 64.64(16)  | Nd(4)-O(10)-Nd(5)     | 104.81(16) |
| O(23)-Nd(3)-O(25) | 70.84(17)  | Nd(5)#1-O(10)-Nd(5)   | 86.91(14)  |

Electronic Supplementary Information for Dalton Transactions  
This journal is © The Royal Society of Chemistry 2009

|                   |            |                     |            |
|-------------------|------------|---------------------|------------|
| O(24)-Nd(3)-O(25) | 49.20(16)  | Nd(2)-O(13)-Nd(1)   | 107.9(2)   |
| O(16)-Nd(3)-O(25) | 123.20(17) | Nd(1)-O(15)-Nd(3)   | 108.49(18) |
| O(29)-Nd(3)-O(25) | 115.80(15) | Nd(4)-O(18)-Nd(2)   | 109.57(19) |
| O(30)-Nd(3)-O(25) | 66.26(15)  | Nd(5)-O(25)-Nd(3)   | 96.48(17)  |
| O(15)-Nd(3)-O(25) | 142.00(16) | Nd(2)-O(28)-Nd(4)   | 113.17(18) |
| O(7)-Nd(3)-O(25)  | 91.66(16)  | Nd(1)-O(29)-Nd(3)   | 114.30(19) |
| O(22)-Nd(4)-O(9)  | 76.21(17)  | Nd(5)-O(30)-Nd(3)   | 98.72(16)  |
| O(22)-Nd(4)-O(10) | 133.31(17) | C(42)-O(30)-Nd(4)   | 84.0(4)    |
| O(9)-Nd(4)-O(10)  | 60.05(15)  | Nd(5)-O(30)-Nd(4)   | 92.81(14)  |
| O(22)-Nd(4)-O(28) | 78.19(18)  | Nd(3)-O(30)-Nd(4)   | 160.9(2)   |
| O(9)-Nd(4)-O(28)  | 86.03(15)  | Nd(5)-O(31)-Nd(4)#1 | 100.67(18) |
| O(10)-Nd(4)-O(28) | 111.89(15) | O(29)-C(42)-O(30)   | 117.5(6)   |
| O(22)-Nd(4)-O(18) | 72.71(19)  | O(29)-C(42)-O(28)   | 123.1(6)   |
| O(9)-Nd(4)-O(18)  | 141.48(17) | O(30)-C(42)-O(28)   | 119.4(6)   |

<sup>a</sup> Symmetry operation: #1 -x+2,-y,-z+2

---
